# Supplementary material for: Morphology-Controlled Synthesis of Polyphosphazene-Based Micro- and Nano-Materials and Their Application as Flame Retardants
Source: MDPI journal article supplement (doi:10.3390/polym14102072), 2022-05-19
Supplement: s1 [file s1]

# Morphology-Controlled Synthesis of Polyphosphazene-Based Micro- and Nano-Materials and Their Application as Flame Retardants

Yuanzhao Zhu <sup>1,2</sup>, Wei Wu <sup>1,2</sup>, Tong Xu <sup>1,2</sup>, Hong Xu <sup>1,2</sup>, Yi Zhong <sup>1,2</sup>, Linping Zhang <sup>1,2</sup>, Yimeng Ma <sup>1,2</sup>, Xiaofeng Sui <sup>1,2</sup>, Bijia Wang <sup>1,2</sup>, Xueling Feng <sup>1,2</sup> and Zhiping Mao <sup>1,2,3,4,\*</sup>

<sup>1</sup> Key Laboratory of Science and Technology of Eco-Textile, Ministry of Education, College of Chemistry, Chemical Engineering and Biotechnology, Donghua University, Shanghai 201620, China; 1189171@mail.dhu.edu.cn (Y.Z.); wuwei@dhu.edu.cn (W.W.); xutong.868@163.com (T.X.); hxu@dhu.edu.cn (H.X.); zhongyi@dhu.edu.cn (Y.Z.); zhang\_lp@dhu.edu.cn (L.Z.); yimeng.ma@dhu.edu.cn (Y.M.); suixf@dhu.edu.cn (X.S.); bwang@dhu.edu.cn (B.W.); xlfeng@dhu.edu.cn (X.F.)

<sup>2</sup> Innovation Center for Textile Science and Technology of Donghua University, Donghua University, Shanghai 201620, China

<sup>3</sup> National Engineering Research Center for Dyeing and Finishing of Textiles, Donghua University, Shanghai 201620, China

<sup>4</sup> National Manufacturing Innovation Center of Advanced Dyeing and Finishing Technology, Donghua University, Shanghai 201620, China

\* Correspondence: zhpmao@dhu.edu.cn

## S1. Characterization of PZSs

Figure S1 shows the resulting product morphologies obtained at different temperatures: (a) room temperature, (b) 80 °C, and (c) 120 °C.

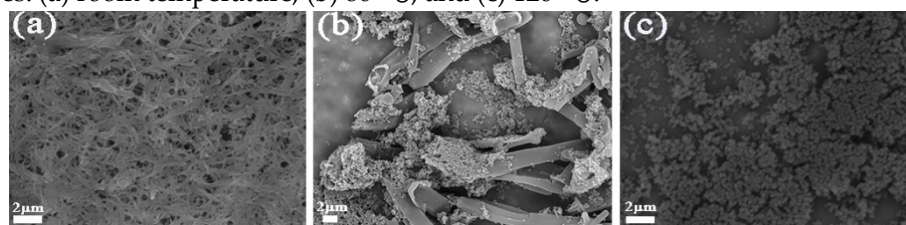

**Figure S1.** SEM images of PZS obtained at different temperatures: (a) room temperature, (b) 80 °C, and (c) 120 °C.

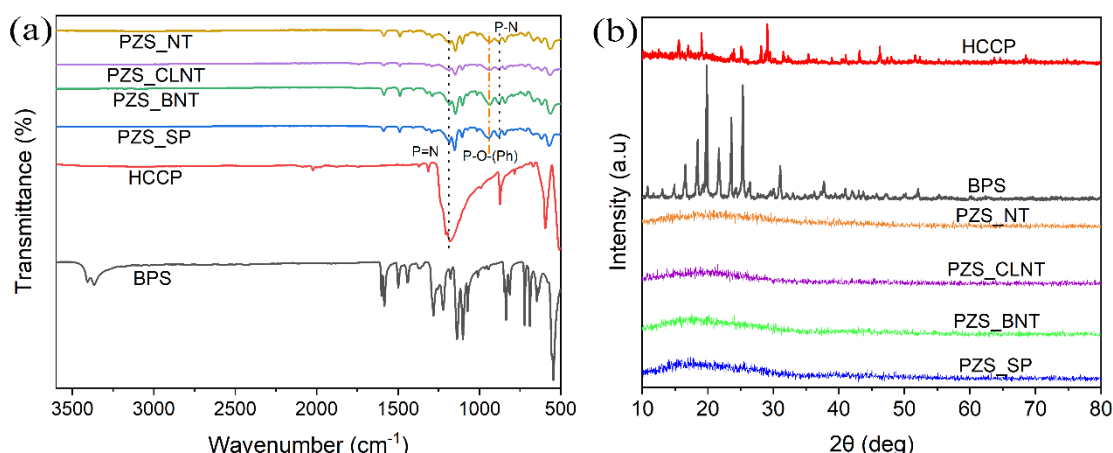

**Figure S2.** (a) FTIR and (b) XRD profiles of HCCP, BPS, PET/PZS\_SP, PET/PZS\_BNT, PET/PZS\_CLNT, and PET/PZS\_NT.

## S2. Dispersibility of PZS in PET

According to the energy dispersive spectroscopy (EDS) mapping of PET/PZS\_SP, PET/PZS\_CLNT, PET/PZS\_BNT, and PET/PZS\_NT, PZS with different morphologies is well dispersed in PET.

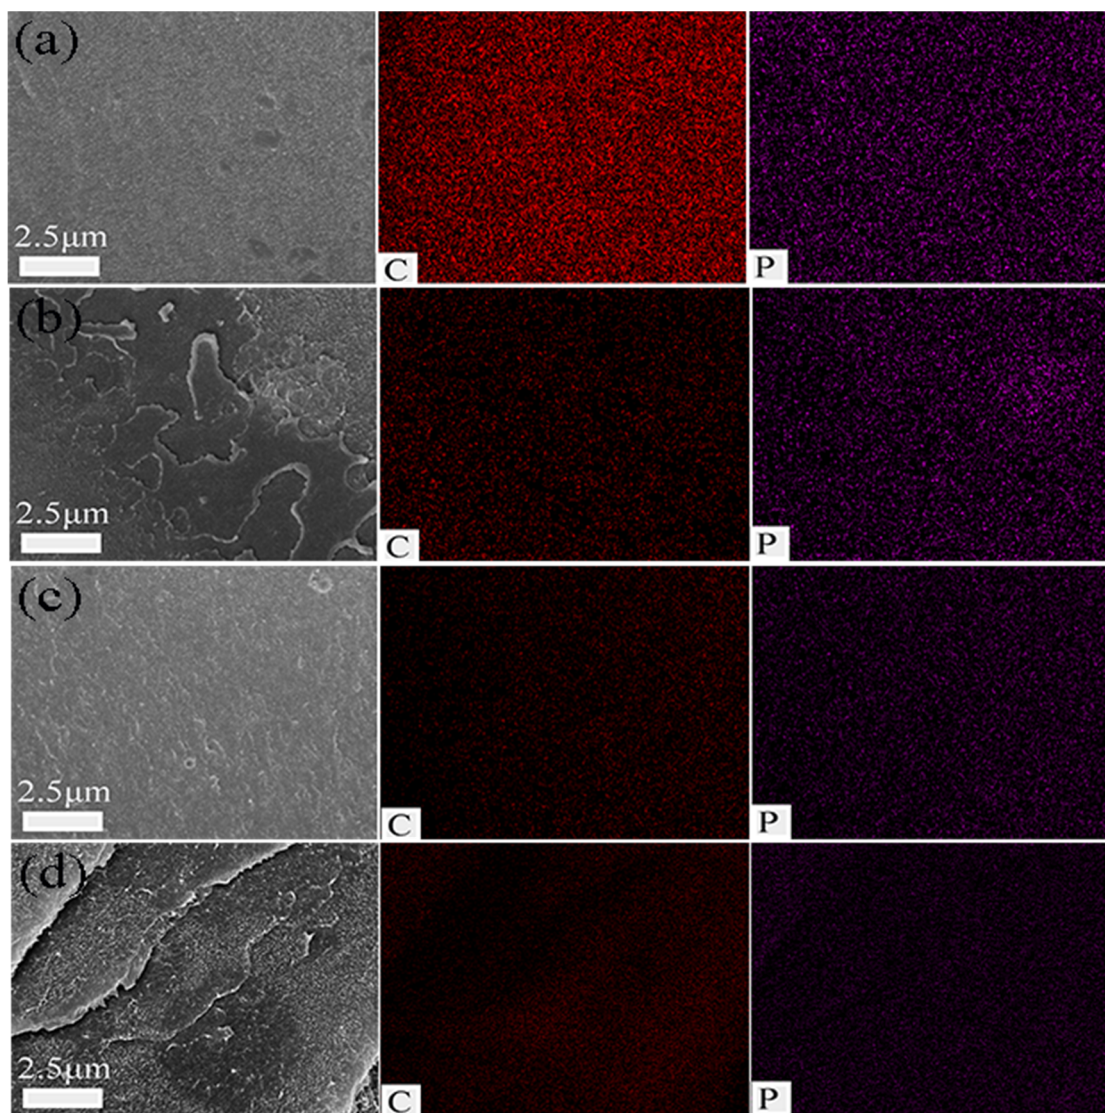

**Figure S3.** EDS mapping of (a) PET/PZS\_SP, (b) PET/PZS\_CLNT, (c) PET/PZS\_BNT, and (d) PET/PZS\_NT.
